# Supplementary material for: Genome-scale de novo assembly using ALGA
Source: Oxford University Press journal article supplement (doi:10.1093/bioinformatics/btab005), 2021-01-06
Supplement: btab005_supplementary_data.pdf [file btab005_supplementary_data.pdf]

# Supplementary material

to the paper

## **“Genome-scale *de novo* assembly using ALGA”**

Sylwester Swat <sup>1</sup>, Artur Laskowski <sup>1</sup>, Jan Badura <sup>1</sup>, Wojciech Frohmberg <sup>1</sup>, Pawel Wojciechowski <sup>1,2</sup>, Aleksandra Swiercz <sup>1,2</sup>, Marta Kasprzak <sup>1</sup>, Jacek Blazewicz <sup>1,2</sup>

1) Poznan University of Technology, Institute of Computing Science, Piotrowo 2, 60-965 Poznan, Poland

2) Institute of Bioorganic Chemistry, Polish Academy of Sciences, Noskowskiego 12/14, 61-704 Poznan, Poland

# 1. Data sets and reference genomes

In the computational experiment, data sets from Illumina paired-end sequencing of six organisms were used. Reference genomes of the organisms were used in the evaluation of the results by QUASt. Links to the files are specified below.

## a) *Homo sapiens* chromosome 14

- genome:  
<https://www.ncbi.nlm.nih.gov/nucleotide/568815584>
- reads:  
[http://gage.cbcb.umd.edu/data/Hg\\_chr14/Data.original/frag\\_1.fastq.gz](http://gage.cbcb.umd.edu/data/Hg_chr14/Data.original/frag_1.fastq.gz)  
[http://gage.cbcb.umd.edu/data/Hg\\_chr14/Data.original/frag\\_2.fastq.gz](http://gage.cbcb.umd.edu/data/Hg_chr14/Data.original/frag_2.fastq.gz)

## b) *Caenorhabditis elegans*

- genome:  
[ftp://ftp.ncbi.nlm.nih.gov/genomes/all/GCF/000/002/985/GCF\\_000002985.6\\_WBcel235/GCF\\_000002985.6\\_WBcel235\\_genomic.fna.gz](ftp://ftp.ncbi.nlm.nih.gov/genomes/all/GCF/000/002/985/GCF_000002985.6_WBcel235/GCF_000002985.6_WBcel235_genomic.fna.gz)
- reads:  
[ftp://ftp.ddbj.nig.ac.jp/ddbj\\_database/dra/fastq/DRA000/DRA000967/DRX007632/DRR008444\\_1.fastq.bz2](ftp://ftp.ddbj.nig.ac.jp/ddbj_database/dra/fastq/DRA000/DRA000967/DRX007632/DRR008444_1.fastq.bz2)  
[ftp://ftp.ddbj.nig.ac.jp/ddbj\\_database/dra/fastq/DRA000/DRA000967/DRX007632/DRR008444\\_2.fastq.bz2](ftp://ftp.ddbj.nig.ac.jp/ddbj_database/dra/fastq/DRA000/DRA000967/DRX007632/DRR008444_2.fastq.bz2)

## c) *Arabidopsis thaliana*

- genome:  
[https://www.ncbi.nlm.nih.gov/assembly/GCA\\_902460285.1](https://www.ncbi.nlm.nih.gov/assembly/GCA_902460285.1)
- reads:  
<https://trace.ncbi.nlm.nih.gov/Traces/sra/?run=ERR3624574>

## d) *Chlorella sorokiniana*

- genome:  
<ftp://ftp.cngb.org/pub/CNSA/data1/CNP0000212/CNS0018477/CNA0000826/>
- reads:  
<http://ftp.cngb.org/pub/CNSA/data1/CNP0000212/CNS0018477/CNX0022250/CNR0026866/>

## e) *Escherichia coli*

- genome:  
[ftp://ftp.ensemblgenomes.org/pub/bacteria/release-45/fasta/bacteria\\_0\\_collection/escherichia\\_coli\\_str\\_k\\_12\\_substr\\_mg1655/dna/Escherichia\\_coli\\_str\\_k\\_12\\_substr\\_mg1655.ASM584v2.dna.chromosome.Chromosome.fa.gz](ftp://ftp.ensemblgenomes.org/pub/bacteria/release-45/fasta/bacteria_0_collection/escherichia_coli_str_k_12_substr_mg1655/dna/Escherichia_coli_str_k_12_substr_mg1655.ASM584v2.dna.chromosome.Chromosome.fa.gz)
- reads:  
[ftp://ftp.sra.ebi.ac.uk/vol1/fastq/ERR022/ERR022075/ERR022075\\_1.fastq.gz](ftp://ftp.sra.ebi.ac.uk/vol1/fastq/ERR022/ERR022075/ERR022075_1.fastq.gz)  
[ftp://ftp.sra.ebi.ac.uk/vol1/fastq/ERR022/ERR022075/ERR022075\\_2.fastq.gz](ftp://ftp.sra.ebi.ac.uk/vol1/fastq/ERR022/ERR022075/ERR022075_2.fastq.gz)

## f) *Microthrix parvicella*

- genome:  
[https://sra-download.ncbi.nlm.nih.gov/traces/wgs03/wgs\\_aux/AM/PG/AMPG01/AMPG01.1.fsa\\_nt.gz](https://sra-download.ncbi.nlm.nih.gov/traces/wgs03/wgs_aux/AM/PG/AMPG01/AMPG01.1.fsa_nt.gz)
- reads:  
<https://sra-downloadb.be-md.ncbi.nlm.nih.gov/sos/sra-pub-run-5/SRR576810/SRR576810.1>

g) *Homo sapiens* whole genome

- genome:  
[https://ftp.ncbi.nlm.nih.gov/genomes/all/GCA/000/001/405/GCA\\_000001405.15\\_GRCh38/GCA\\_000001405.15\\_GRCh38\\_genomic.fna.gz](https://ftp.ncbi.nlm.nih.gov/genomes/all/GCA/000/001/405/GCA_000001405.15_GRCh38/GCA_000001405.15_GRCh38_genomic.fna.gz)
- reads:  
<https://trace.ncbi.nlm.nih.gov/Traces/sra/?run=ERR3587301>

## 2. Software

For all the programs from the computational experiment, their versions and web pages with source codes are given.

### a) ALGA

- version: 1.0.3 (access date 25 Nov 2020)
- source: <http://alga.put.poznan.pl>

### b) GRASShopper

- version: – (access date 10 Jan 2020)
- source: <https://sourceforge.net/projects/grasshopper-assembler>

### c) MEGAHIT

- version: 1.2.9 (access date 12 May 2020)
- source: [https://github.com/voutcn/megahit/releases/download/v1.2.9/MEGAHIT-1.2.9-Linux-x86\\_64-static.tar.gz](https://github.com/voutcn/megahit/releases/download/v1.2.9/MEGAHIT-1.2.9-Linux-x86_64-static.tar.gz)

### d) Platanus

- version: 1.2.4 (access date 14 Apr 2020)
- source: <http://platanus.bio.titech.ac.jp/platanus-assembler/platanus-1-2-4>

### e) Readjoiner

- version: 1.6.1 (access date 3 Mar 2020)
- source: <http://genometools.org/pub>

### f) SAGE2

- version: 1.0.0 (access date 22 Apr 2020)
- source: <https://github.com/lucian-ilie/SAGE2>

### g) SGA

- version: 0.10.14 (access date 3 Mar 2020)
- source: downloaded with command “docker pull ljdursi/sga-docker”

### h) SOAPdenovo2

- version: 2.04 (access date 17 Apr 2020)
- source: <https://github.com/aquaskyline/SOAPdenovo2>

### i) SPAdes

- version: 3.14.0 (access date 26 Dec 2019)
- source: <http://cab.spbu.ru/software/spades>

### j) Velvet

- version: 1.2.10 (access date 22 Jan 2020)
- source: <https://www.ebi.ac.uk/~zerbino/velvet>

### k) Musket

- version: 1.1 (access date 2 Jan 2020)
- source: <http://musket.sourceforge.net>

l) QUAST

- version: 5.0.2 (access date 22 Nov 2019)
- source: <http://quast.sourceforge.net/quast.html>

m) BUSCO

- version: 4.0.5 (access date 20 May 2020)
- source: downloaded with command “`docker pull ezlabgva/busco:v4.0.5_cv1`”

### 3. Program parameters

The following parameters were specified while the programs were executed. Parameters pointing to the input and output files, as well as parameters used for an additional description of a particular data set (e.g. expected depth of coverage, expected genome size, or average insert size), are omitted. Most of the settings were recommended by the authors of the software. Some of the programs did not require a parameter for the number of threads and automatically took 16 available cores.

#### a) ALGA

- "--threads=16" (16 threads)

#### b) GRASShopPER

- "-ws=50", "-sli=31", "-ss=14", "-awa=TRUE" (program-specific parameters steering the level of exactness)
- "-e=4", "-fs=2" (tolerance to errors)
- "-minconf=7", "-maxrefs=7" (tolerance to distant paired-end reads)
- "-sc=140", "-ps=140", "-trimparams="ILLUMINACLIP:\${TRIMMOMATIC\_PATH}/adapters/TruSeq3-PE.fa:2:30:10 SLIDINGWINDOW:30:20 LEADING:15 TRAILING:15 MINLEN:85 CROP:210"" (parameters set for *C. sorokiniana* because of longer reads)

#### c) MEGAHIT

- "-t 16" (16 threads)

#### d) Platanus

- "-m 128" (memory limit)
- "-t 16" (16 threads)

#### e) Readjoinder

- "-l 60" (minimum allowed length of overlaps of reads)
- "-j 8" (8 threads, 16 didn't work)
- "-spmfiles 8" (8 threads)
- parameters characterizing the input data set

#### f) SAGE2

- "-k 50" (minimum allowed length of overlaps of reads)

#### g) SGA

- "--pe-mode 1" (a mode of pairing reads)
- "-a ropebwt", "--no-reverse", "-k 41", "--discard", "--learn" (parameters for error correction)
- "-x 2", "--homopolymer-check", "--low-complexity-check" (parameters for filtering reads)
- "-m 55" (minimum allowed length of overlaps of reads)
- "-m 75" (at the assembly stage, minimum allowed length of overlaps of merged paths)
- "-g 0", "-r 10" (other parameters for the assembly stage)
- "-t 16" (16 threads)

h) SOAPdenovo2

- “-K 63” (length of k-mers)
- “-R” (resolving repeats by reads)
- “asm\_flags=3”, “rank=1”, “pair\_num\_cutoff=3”, “map\_len=32” (program-specific parameters)
- parameters characterizing the input data set

i) SPAdes

- “-k 21,33,55,77” (lengths of k-mers)
- “--careful” (a parameter for error reduction)

j) Velvet

- parameters characterizing the input data set

k) Musket

- “-omulti” (produces multiple output files)
- “-p 18” (18 threads)

l) QUASt

- “--min-contig 250” (or “--min-contig 500” for *C. sorokiniana* because of longer reads)
- “--ambiguity-usage one” (takes one best alignment of a contig)
- “--space-efficient” (creates only primary output)
- “--threads 16” (16 threads)

m) BUSCO

- “-m genome” (sets the assessment mode to genome)
- “-l <data set>” (specifies the BUSCO lineage data set)

## 4. How to use ALGA

For more information about ALGA please visit <http://alga.put.poznan.pl>.

### a) REQUIREMENTS

- CMake version 2.8.7 or higher
- C++ 17 or higher

### b) INSTALLATION

- Download the archive with code of ALGA and unpack it, or clone the ALGA repository. Use CMake to obtain the binary file. For example, in Linux, in the main directory of ALGA, you can use the following commands:
  - `mkdir build`
  - `cd build`
  - `cmake ..`
  - `make`
- After this, the executable file named "ALGA" is in directory "build"

### c) USAGE TIPS

- It is strongly recommended to use Musket, a tool for read correction based on a k-mer analysis, before running ALGA
- A typical usage of ALGA consists in specifying one or two input files (both with .fastq or .fasta extension), the number of threads and the output file name for contigs. An example:

```
./ALGA --file1=path1/corrected-reads_1.fastq
      --file2=path2/corrected-reads_2.fastq
      --threads=8
      --output=contigs.fasta
```
- Only one input file may be specified, just remove the argument  
`--file2=path2/corrected-reads_2.fastq`
- The number of threads is an optional parameter and can be removed, it is set to 6 by default

### d) ADDITIONAL PARAMETER

- If you suspect that the input data are for some reason of very poor quality and may – even after the read correction – still contain a large number of errors, you can additionally use the option  
`--error-rate=0.02`  
(the specified value, here 0.02, denotes the average expected fraction of errors).

## 5. Results of computations

On the subsequent pages, detailed results of the computational experiment are shown. Tables S1–S6 present reports from QUAST for all assemblers and data sets used in the assemblers' comparison. Tables S7–S12 present results of evaluation by BUSCO. Tables S13–S15 show the usage of time and memory. Table S16 presents a QUAST report for tests with a whole human genome data set. Table S17 contains results of ALGA executed with the additional parameter "--error-rate=0.05".



Table S1: HOMO SAPIENS CHROMOSOME 14

REPORT FROM QUAST FOR ASSEMBLY RESULTS

| Genome statistics             | ALGA     | GRASShopper | MEGAHIT  | Platanus | Readjoiner | SAGE2    | SGA      | SOAPdenovo2 | SPAdes   | Velvet   |
|-------------------------------|----------|-------------|----------|----------|------------|----------|----------|-------------|----------|----------|
| Genome fraction (%)           | 92.963   | 91.353      | 90.59    | 76.156   | 56.802     | 78.717   | 90.859   | 92.643      | 94.459   | 90.857   |
| Duplication ratio             | 1.003    | 1.04        | 1.009    | 1.005    | 1.083      | 1.002    | 1.007    | 1.01        | 1.011    | 1.012    |
| Largest alignment             | 64709    | 29556       | 99626    | 15459    | 3233       | 44201    | 63564    | 61616       | 103374   | 41413    |
| Total aligned length          | 84443371 | 85870994    | 82525950 | 69304095 | 55711845   | 71351973 | 82856749 | 84664412    | 86468768 | 83025542 |
| NG50                          | 5811     | 1860        | 10448    | 1113     | 300        | 1357     | 5092     | 3895        | 5846     | 2751     |
| NG75                          | 2505     | 765         | 4467     | 281      | -          | 380      | 2205     | 1738        | 2455     | 1265     |
| NA50                          | 6360     | 2000        | 10409    | 1615     | 431        | 1954     | 5698     | 4248        | 6121     | 3051     |
| NA75                          | 3143     | 945         | 5201     | 860      | 323        | 982      | 2896     | 2126        | 2804     | 1583     |
| NGA50                         | 5798     | 1855        | 9231     | 1112     | 300        | 1355     | 5077     | 3889        | 5743     | 2723     |
| NGA75                         | 2496     | 757         | 3872     | 280      | -          | 377      | 2191     | 1732        | 2412     | 1235     |
| LG50                          | 4271     | 12867       | 2416     | 20540    | 93285      | 15568    | 4971     | 6351        | 3825     | 9148     |
| LG75                          | 10164    | 31564       | 5692     | 58978    | -          | 45762    | 11679    | 15038       | 9864     | 21231    |
| LA50                          | 3737     | 11603       | 2270     | 12421    | 43782      | 9525     | 4226     | 5581        | 3529     | 7882     |
| LA75                          | 8433     | 27285       | 5085     | 27165    | 81405      | 22565    | 9307     | 12612       | 8759     | 17386    |
| LGA50                         | 4277     | 12887       | 2689     | 20544    | 93340      | 15584    | 4980     | 6355        | 3908     | 9215     |
| LGA75                         | 10186    | 31666       | 6452     | 59037    | -          | 45912    | 11714    | 15061       | 10053    | 21497    |
| Misassemblies                 |          |             |          |          |            |          |          |             |          |          |
| # misassemblies               | 60       | 213         | 2109     | 1        | 3          | 5        | 56       | 17          | 340      | 818      |
| # relocations                 | 56       | 213         | 2097     | 1        | 3          | 5        | 56       | 16          | 339      | 817      |
| # translocations              | 0        | 0           | 0        | 0        | 0          | 0        | 0        | 0           | 0        | 0        |
| # inversions                  | 4        | 0           | 12       | 0        | 0          | 0        | 0        | 1           | 1        | 1        |
| # misassembled contigs        | 59       | 210         | 1884     | 1        | 3          | 5        | 56       | 17          | 334      | 751      |
| Misassembled contigs length   | 273648   | 172376      | 17843346 | 786      | 1103       | 9643     | 303731   | 37087       | 3012555  | 1384361  |
| # local misassemblies         | 16       | 342         | 143      | 5        | 1          | 6        | 17       | 11          | 51       | 292      |
| # scaffold gap ext. mis.      | 0        | 0           | 0        | 0        | 0          | 0        | 0        | 0           | 0        | 0        |
| # scaffold gap loc. mis.      | 0        | 0           | 0        | 0        | 0          | 0        | 0        | 0           | 0        | 0        |
| # unaligned mis. contigs      | 3        | 1           | 5        | 0        | 2          | 2        | 2        | 3           | 2        | 42       |
| Unaligned                     |          |             |          |          |            |          |          |             |          |          |
| # fully unaligned contigs     | 34       | 52          | 12       | 34       | 51         | 34       | 12       | 28          | 47       | 40       |
| Fully unaligned length        | 24666    | 27052       | 12388    | 14595    | 20105      | 21032    | 16989    | 20852       | 20154    | 23462    |
| # partially unaligned contigs | 6        | 7           | 27       | 2        | 2          | 8        | 10       | 7           | 13       | 104      |
| Partially unaligned length    | 8948     | 7956        | 40748    | 1123     | 1170       | 7841     | 14386    | 11467       | 26513    | 98449    |
| Mismatches                    |          |             |          |          |            |          |          |             |          |          |
| # mismatches                  | 78129    | 115496      | 112232   | 52032    | 30310      | 43139    | 71946    | 72964       | 80807    | 81455    |
| # indels                      | 11529    | 15289       | 18777    | 2227     | 2560       | 8210     | 8139     | 9964        | 17295    | 11921    |
| Indels length                 | 40495    | 54275       | 75283    | 6344     | 7491       | 24806    | 30188    | 30580       | 71312    | 53138    |
| # mismatches per 100 kbp      | 92.8     | 139.59      | 136.79   | 75.44    | 58.92      | 60.51    | 87.43    | 86.96       | 94.46    | 98.99    |
| # indels per 100 kbp          | 13.69    | 18.48       | 22.89    | 3.23     | 4.98       | 11.52    | 9.89     | 11.88       | 20.22    | 14.49    |
| # indels (<= 5 bp)            | 9891     | 13642       | 16156    | 2037     | 2313       | 7292     | 6934     | 8797        | 14457    | 10231    |
| # indels (> 5 bp)             | 1638     | 1647        | 2621     | 190      | 247        | 918      | 1205     | 1167        | 2838     | 1690     |
| # N's                         | 0        | 0           | 0        | 0        | 0          | 0        | 0        | 0           | 1        | 0        |
| # N's per 100 kbp             | 0        | 0           | 0        | 0        | 0          | 0        | 0        | 0           | 0        | 0        |
| Statistics without reference  |          |             |          |          |            |          |          |             |          |          |
| # contigs                     | 26484    | 75294       | 13091    | 62936    | 130777     | 55888    | 27458    | 36581       | 28037    | 44441    |
| # contigs (>= 0 bp)           | 30207    | 87970       | 13152    | 626436   | 1341049    | 129096   | 115956   | 173124      | 74279    | 44441    |
| # contigs (>= 1000 bp)        | 16913    | 26059       | 11236    | 23207    | 3032       | 22177    | 17874    | 21423       | 17680    | 25092    |
| # contigs (>= 5000 bp)        | 5210     | 1946        | 5224     | 775      | 0          | 1713     | 5090     | 4337        | 4682     | 3171     |
| # contigs (>= 10000 bp)       | 1743     | 206         | 2546     | 26       | 0          | 234      | 1415     | 980         | 1672     | 400      |
| # contigs (>= 25000 bp)       | 102      | 3           | 424      | 0        | 0          | 2        | 62       | 31          | 235      | 3        |
| # contigs (>= 50000 bp)       | 5        | 0           | 34       | 0        | 0          | 0        | 2        | 1           | 24       | 0        |
| Largest contig                | 64709    | 29556       | 99626    | 15460    | 3233       | 44201    | 63564    | 61616       | 103374   | 41413    |
| Total length                  | 84492543 | 86076655    | 82843300 | 69330571 | 55750155   | 71428656 | 82915135 | 84761155    | 86553965 | 83362754 |
| Total length (>= 0 bp)        | 85234924 | 88032101    | 82856672 | 99891985 | 226219328  | 80715479 | 93744225 | 97855849    | 93222662 | 83362754 |
| Total length (>= 1000 bp)     | 79546977 | 63435124    | 81570455 | 48335261 | 3759105    | 53217765 | 77935439 | 76823136    | 80946498 | 72638496 |
| Total length (>= 5000 bp)     | 50590884 | 13979749    | 66072398 | 4980567  | 0          | 12836011 | 46122967 | 36663757    | 50156448 | 23689097 |
| Total length (>= 10000 bp)    | 26507413 | 2582469     | 46854598 | 297078   | 0          | 3017164  | 20588597 | 13641978    | 29349091 | 5170444  |
| Total length (>= 25000 bp)    | 3290094  | 86168       | 14767556 | 0        | 0          | 83324    | 1942291  | 964962      | 8278743  | 95628    |
| Total length (>= 50000 bp)    | 308375   | 0           | 2205049  | 0        | 0          | 0        | 122798   | 61616       | 1482475  | 0        |
| N50                           | 6375     | 2000        | 11701    | 1615     | 431        | 1956     | 5723     | 4251        | 6258     | 3083     |
| N75                           | 3149     | 950         | 5979     | 860      | 323        | 984      | 2905     | 2132        | 2850     | 1614     |
| L50                           | 3732     | 11586       | 2045     | 12419    | 43765      | 9518     | 4219     | 5578        | 3453     | 7829     |
| L75                           | 8417     | 27215       | 4506     | 27158    | 81361      | 22534    | 9283     | 12596       | 8591     | 17208    |
| GC (%)                        | 40.73    | 40.31       | 40.77    | 39.42    | 37.38      | 40.15    | 40.54    | 40.68       | 40.79    | 40.49    |

Table S2: CAENORHABDITIS ELEGANS

REPORT FROM QUAST FOR ASSEMBLY RESULTS

| Genome statistics             | ALGA     | GRASShopper | MEGAHIT  | Platanus  | Readjoiner | SAGE2    | SGA       | SOAPdenovo2 | SPAdes    | Velvet   |
|-------------------------------|----------|-------------|----------|-----------|------------|----------|-----------|-------------|-----------|----------|
| Genome fraction (%)           | 95.335   | 95.57       | 95.653   | 93.93     |            | 88.305   | 96.146    | 94.427      | 95.798    | 93.34    |
| Duplication ratio             | 1.004    | 1.019       | 1.009    | 1.005     |            | 1.002    | 1.01      | 1.004       | 1.003     | 1.008    |
| Largest alignment             | 147732   | 96243       | 218906   | 125773    |            | 50722    | 164617    | 127853      | 383483    | 35134    |
| Total aligned length          | 95905046 | 97543907    | 96582293 | 94672992  |            | 88664856 | 97326423  | 95042222    | 96271132  | 94263994 |
| NG50                          | 15255    | 8676        | 24752    | 11441     |            | 4976     | 14980     | 11208       | 38172     | 4615     |
| NG75                          | 5792     | 3097        | 10637    | 4158      |            | 1829     | 6007      | 4367        | 17492     | 2226     |
| NA50                          | 16229    | 9019        | 23394    | 12607     |            | 5939     | 15567     | 12155       | 39195     | 4914     |
| NA75                          | 6781     | 3398        | 10594    | 5109      |            | 2816     | 6644      | 5219        | 18999     | 2593     |
| NGA50                         | 15245    | 8655        | 22215    | 11428     |            | 4970     | 14967     | 11202       | 37084     | 4601     |
| NGA75                         | 5767     | 3067        | 9522     | 4148      |            | 1823     | 5985      | 4355        | 16880     | 2211     |
| LG50                          | 1684     | 2871        | 1087     | 2162      |            | 5184     | 1753      | 2284        | 703       | 6260     |
| LG75                          | 4333     | 7728        | 2608     | 5807      |            | 13345    | 4380      | 5840        | 1663      | 14032    |
| LA50                          | 1550     | 2733        | 1119     | 1933      |            | 4126     | 1661      | 2066        | 679       | 5652     |
| LA75                          | 3830     | 7167        | 2646     | 4914      |            | 9559     | 4050      | 5044        | 1564      | 12231    |
| LGA50                         | 1686     | 2876        | 1193     | 2163      |            | 5187     | 1754      | 2286        | 730       | 6274     |
| LGA75                         | 4343     | 7754        | 2896     | 5815      |            | 13364    | 4390      | 5850        | 1726      | 14079    |
| Misassemblies                 |          |             |          |           |            |          |           |             |           |          |
| # misassemblies               | 44       | 202         | 1097     | 34        |            | 9        | 54        | 29          | 189       | 133      |
| # relocations                 | 20       | 86          | 381      | 14        |            | 5        | 23        | 10          | 79        | 88       |
| # translocations              | 22       | 100         | 663      | 20        |            | 4        | 26        | 19          | 102       | 34       |
| # inversions                  | 2        | 16          | 53       | 0         |            | 0        | 5         | 0           | 8         | 11       |
| # misassembled contigs        | 43       | 196         | 982      | 33        |            | 9        | 52        | 27          | 179       | 131      |
| Misassembled contigs length   | 230643   | 372887      | 18951683 | 107797    |            | 46987    | 217060    | 117660      | 6823210   | 423098   |
| # local misassemblies         | 92       | 436         | 745      | 52        |            | 29       | 95        | 56          | 246       | 168      |
| # scaffold gap ext. mis.      | 0        | 0           | 0        | 0         |            | 0        | 0         | 0           | 0         | 0        |
| # scaffold gap loc. mis.      | 0        | 0           | 0        | 0         |            | 0        | 0         | 0           | 0         | 0        |
| # unaligned mis. contigs      | 16       | 17          | 14       | 18        |            | 1        | 15        | 11          | 10        | 9        |
| Unaligned                     |          |             |          |           |            |          |           |             |           |          |
| # fully unaligned contigs     | 25       | 48          | 21       | 20        |            | 41       | 18        | 29          | 36        | 33       |
| Fully unaligned length        | 10651    | 24715       | 9812     | 14106     |            | 31378    | 9586      | 19034       | 19072     | 28275    |
| # partially unaligned contigs | 41       | 36          | 62       | 28        |            | 12       | 43        | 32          | 43        | 27       |
| Partially unaligned length    | 51732    | 44082       | 76579    | 37075     |            | 16805    | 52955     | 38793       | 67046     | 28592    |
| Mismatches                    |          |             |          |           |            |          |           |             |           |          |
| # mismatches                  | 6959     | 30904       | 34050    | 1989      |            | 1609     | 4237      | 2805        | 9812      | 9664     |
| # indels                      | 2023     | 5882        | 6815     | 1152      |            | 972      | 1431      | 1214        | 3318      | 9866     |
| Indels length                 | 8726     | 52982       | 85102    | 4186      |            | 2458     | 6691      | 3740        | 35037     | 20361    |
| # mismatches per 100 kbp      | 7.28     | 32.24       | 35.5     | 2.11      |            | 1.82     | 4.39      | 2.96        | 10.21     | 10.32    |
| # indels per 100 kbp          | 2.12     | 6.14        | 7.1      | 1.22      |            | 1.1      | 1.48      | 1.28        | 3.45      | 10.54    |
| # indels (<= 5 bp)            | 1824     | 4863        | 5163     | 1069      |            | 917      | 1290      | 1136        | 2662      | 9564     |
| # indels (> 5 bp)             | 199      | 1019        | 1652     | 83        |            | 55       | 141       | 78          | 656       | 302      |
| # N's                         | 0        | 0           | 0        | 0         |            | 0        | 0         | 0           | 0         | 0        |
| # N's per 100 kbp             | 0        | 0           | 0        | 0         |            | 0        | 0         | 0           | 0         | 0        |
| Statistics without reference  |          |             |          |           |            |          |           |             |           |          |
| # contigs                     | 19063    | 35848       | 10951    | 21927     |            | 30321    | 20634     | 20858       | 7986      | 33681    |
| # contigs (>= 0 bp)           | 25680    | 88966       | 11563    | 136921    |            | 52795    | 331218    | 209935      | 57574     | 33681    |
| # contigs (>= 1000 bp)        | 10524    | 15222       | 7321     | 12654     |            | 18696    | 10813     | 12835       | 4924      | 22409    |
| # contigs (>= 5000 bp)        | 4851     | 5122        | 4196     | 5005      |            | 5166     | 5020      | 5258        | 3214      | 5497     |
| # contigs (>= 10000 bp)       | 2714     | 2385        | 2757     | 2539      |            | 1694     | 2782      | 2632        | 2355      | 1240     |
| # contigs (>= 25000 bp)       | 773      | 453         | 1075     | 627       |            | 112      | 769       | 582         | 1189      | 26       |
| # contigs (>= 50000 bp)       | 172      | 47          | 304      | 103       |            | 1        | 156       | 84          | 469       | 0        |
| Largest contig                | 147732   | 96243       | 218906   | 125773    |            | 50722    | 164617    | 127853      | 383483    | 35134    |
| Total length                  | 96006321 | 97758741    | 96923847 | 94757369  |            | 88745523 | 97428088  | 95149169    | 96410279  | 94382960 |
| Total length (>= 0 bp)        | 97237655 | 106979488   | 97061141 | 106169149 |            | 92043573 | 134763311 | 110902367   | 101625212 | 94382960 |
| Total length (>= 1000 bp)     | 92062461 | 88950869    | 95083419 | 90291892  |            | 82531881 | 93056145  | 91237251    | 95115694  | 88231995 |
| Total length (>= 5000 bp)     | 78008376 | 64944282    | 87126307 | 71562781  |            | 50057082 | 78722041  | 72499821    | 90706462  | 46483505 |
| Total length (>= 10000 bp)    | 62841160 | 45619590    | 76758094 | 54172437  |            | 25830676 | 62781454  | 53816723    | 84513267  | 17143007 |
| Total length (>= 25000 bp)    | 32469497 | 16316123    | 49854487 | 24628989  |            | 3500935  | 31456758  | 22345962    | 65238878  | 747033   |
| Total length (>= 50000 bp)    | 11830162 | 2946779     | 22867086 | 6789331   |            | 50722    | 10680298  | 5504420     | 39866132  | 0        |
| N50                           | 16265    | 9033        | 25917    | 12616     |            | 5950     | 15590     | 12169       | 40738     | 4927     |
| N75                           | 6796     | 3420        | 12186    | 5120      |            | 2823     | 6665      | 5228        | 19710     | 2608     |
| L50                           | 1548     | 2729        | 1021     | 1932      |            | 4124     | 1659      | 2064        | 654       | 5640     |
| L75                           | 3822     | 7145        | 2387     | 4908      |            | 9550     | 4042      | 5036        | 1508      | 12194    |
| GC (%)                        | 35.36    | 35.39       | 35.42    | 35.36     |            | 35.3     | 35.39     | 35.37       | 35.38     | 35.34    |

Readjoinder finished computations, but all its contigs were shorter than 250 and QUAST did not included these results.

Table S3: ARABIDOPSIS THALIANA

REPORT FROM QUAST FOR ASSEMBLY RESULTS

| Genome statistics             | ALGA      | GRASShopper | MEGAHIT   | Platanus  | Readjoiner | SAGE2     | SGA       | SOAPdenovo2 | SPAdes    | Velvet    |
|-------------------------------|-----------|-------------|-----------|-----------|------------|-----------|-----------|-------------|-----------|-----------|
| Genome fraction (%)           | 94.655    |             | 95.75     | 91.449    | 84.334     | 87.178    | 95.851    | 93.985      | 95.462    | 92.016    |
| Duplication ratio             | 1.008     |             | 1.018     | 1.007     | 1.132      | 1.004     | 1.013     | 1.007       | 1.004     | 1.011     |
| Largest alignment             | 177159    |             | 392309    | 101718    | 3315       | 31479     | 159831    | 105557      | 731281    | 26666     |
| Total aligned length          | 114674522 |             | 116911228 | 110734440 | 114863433  | 105309017 | 116689301 | 113798844   | 115274330 | 111813891 |
| NG50                          | 15039     |             | 50273     | 10711     | 487        | 3887      | 19877     | 12070       | 91778     | 4486      |
| NG75                          | 5615      |             | 19274     | 3786      | 345        | 1523      | 7750      | 4902        | 37172     | 2203      |
| NA50                          | 14889     |             | -         | 11603     | 493        | 3273      | 19042     | 11896       | -         | 3254      |
| NA75                          | 5446      |             | -         | 4796      | 350        | 581       | 6955      | 4710        | -         | -         |
| NGA50                         | 14804     |             | 46100     | 10554     | 484        | 3834      | 19503     | 11927       | 88072     | 4435      |
| NGA75                         | 5353      |             | 17091     | 3617      | 341        | 1423      | 7488      | 4754        | 34640     | 2089      |
| LG50                          | 2148      |             | 648       | 3006      | 83339      | 8702      | 1665      | 2803        | 342       | 8280      |
| LG75                          | 5321      |             | 1617      | 7644      | 157038     | 20717     | 4058      | 6626        | 849       | 17623     |
| LA50                          | 2178      |             | -         | 2720      | 80621      | 10663     | 1741      | 2844        | -         | 12372     |
| LA75                          | 5402      |             | -         | 6458      | 151570     | 31936     | 4334      | 6787        | -         | -         |
| LGA50                         | 2190      |             | 691       | 3065      | 83683      | 8777      | 1693      | 2831        | 358       | 8332      |
| LGA75                         | 5450      |             | 1759      | 7829      | 158064     | 21213     | 4139      | 6737        | 894       | 17923     |
| Misassemblies                 |           |             |           |           |            |           |           |             |           |           |
| # misassemblies               | 106       |             | 854       | 26        | 10         | 6         | 109       | 48          | 189       | 106       |
| # relocations                 | 42        |             | 243       | 9         | 2          | 0         | 42        | 21          | 70        | 65        |
| # translocations              | 53        |             | 603       | 17        | 7          | 6         | 66        | 27          | 116       | 41        |
| # inversions                  | 11        |             | 8         | 0         | 1          | 0         | 1         | 0           | 3         | 0         |
| # misassembled contigs        | 103       |             | 788       | 25        | 10         | 6         | 103       | 46          | 173       | 102       |
| Misassembled contigs length   | 583896    |             | 13255971  | 8201      | 3147       | 20460     | 83601     | 41609       | 7726132   | 400206    |
| # local misassemblies         | 23        |             | 258       | 6         | 3          | 7         | 50        | 15          | 85        | 72        |
| # scaffold gap ext. mis.      | 0         |             | 0         | 0         | 0          | 0         | 0         | 0           | 0         | 0         |
| # scaffold gap loc. mis.      | 0         |             | 0         | 0         | 0          | 0         | 0         | 0           | 0         | 0         |
| # unaligned mis. contigs      | 30        |             | 52        | 12        | 5          | 1         | 47        | 28          | 38        | 10        |
| Unaligned                     |           |             |           |           |            |           |           |             |           |           |
| # fully unaligned contigs     | 9596      |             | 208158    | 2015      | 7066       | 81936     | 8140      | 15435       | 239172    | 107203    |
| Fully unaligned length        | 5192711   |             | 121335023 | 1914284   | 2447441    | 28385413  | 5360850   | 6747238     | 147056431 | 39233939  |
| # partially unaligned contigs | 35        |             | 177       | 19        | 5          | 3         | 68        | 30          | 288       | 20        |
| Partially unaligned length    | 48510     |             | 330988    | 20282     | 4174       | 4174      | 82145     | 36783       | 357368    | 24630     |
| Mismatches                    |           |             |           |           |            |           |           |             |           |           |
| # mismatches                  | 17157     |             | 76153     | 7258      | 2411       | 3002      | 14742     | 8857        | 22386     | 13412     |
| # indels                      | 5547      |             | 11951     | 4098      | 1666       | 3951      | 5077      | 4280        | 7403      | 5657      |
| Indels length                 | 8997      |             | 53960     | 5607      | 2128       | 6452      | 7980      | 5768        | 23579     | 13671     |
| # mismatches per 100 kbp      | 15.07     |             | 66.1      | 6.6       | 2.38       | 2.86      | 12.78     | 7.83        | 19.49     | 12.11     |
| # indels per 100 kbp          | 4.87      |             | 10.37     | 3.72      | 1.64       | 3.77      | 4.4       | 3.78        | 6.45      | 5.11      |
| # indels (<= 5 bp)            | 5411      |             | 10639     | 4033      | 1656       | 3864      | 4965      | 4233        | 6837      | 5401      |
| # indels (> 5 bp)             | 136       |             | 1312      | 65        | 10         | 87        | 112       | 47          | 566       | 256       |
| # N's                         | 0         |             | 0         | 0         | 0          | 0         | 0         | 0           | 13        | 0         |
| # N's per 100 kbp             | 0         |             | 0         | 0         | 0          | 0         | 0         | 0           | 0         | 0         |
| Statistics without reference  |           |             |           |           |            |           |           |             |           |           |
| # contigs                     | 40253     |             | 224076    | 32617     | 249705     | 127066    | 35438     | 43665       | 248486    | 152488    |
| # contigs (>= 0 bp)           | 57267     |             | 228980    | 311472    | 1418620    | 231460    | 754044    | 511100      | 407580    | 152488    |
| # contigs (>= 1000 bp)        | 12490     |             | 19525     | 14583     | 9413       | 26081     | 11244     | 14364       | 32049     | 27361     |
| # contigs (>= 5000 bp)        | 5701      |             | 3555      | 6262      | 0          | 5876      | 5304      | 6540        | 2549      | 6920      |
| # contigs (>= 10000 bp)       | 3412      |             | 2379      | 3262      | 0          | 1182      | 3338      | 3536        | 1725      | 1106      |
| # contigs (>= 25000 bp)       | 989       |             | 1326      | 613       | 0          | 13        | 1172      | 699         | 1108      | 1         |
| # contigs (>= 50000 bp)       | 140       |             | 653       | 63        | 0          | 0         | 262       | 55          | 673       | 0         |
| Largest contig                | 178991    |             | 643625    | 635011    | 3315       | 31479     | 347434    | 105557      | 731281    | 26666     |
| Total length                  | 119997086 |             | 238907422 | 112701156 | 117346509  | 133724486 | 122218175 | 120647466   | 262758271 | 151134178 |
| Total length (>= 0 bp)        | 123471608 |             | 240010301 | 137436278 | 284865355  | 154001638 | 203821058 | 165403051   | 282111111 | 151134178 |
| Total length (>= 1000 bp)     | 108262050 |             | 135209380 | 104449522 | 11667358   | 96923001  | 111714069 | 108859258   | 158775459 | 105060267 |
| Total length (>= 5000 bp)     | 92273086  |             | 109299251 | 84226871  | 0          | 47735119  | 98043456  | 89829764    | 113724808 | 53744388  |
| Total length (>= 10000 bp)    | 75789942  |             | 101055156 | 62823889  | 0          | 15663454  | 83915903  | 68256314    | 108014997 | 13936005  |
| Total length (>= 25000 bp)    | 37778697  |             | 83919084  | 22203231  | 0          | 365318    | 49218349  | 24672850    | 98129990  | 26666     |
| Total length (>= 50000 bp)    | 9226212   |             | 60423816  | 4386585   | 0          | 0         | 18157798  | 3389167     | 82695776  | 0         |
| N50                           | 15102     |             | 1884      | 11798     | 496        | 3337      | 19342     | 12043       | 1656      | 3324      |
| N75                           | 5703      |             | 562       | 4943      | 354        | 765       | 7237      | 4862        | 613       | 553       |
| L50                           | 2137      |             | 6935      | 2667      | 80296      | 10557     | 1713      | 2816        | 9933      | 12259     |
| L75                           | 5276      |             | 81093     | 6323      | 150625     | 29935     | 4246      | 6674        | 81730     | 38880     |
| GC (%)                        | 35.79     |             | 32.62     | 35.84     | 35.77      | 34.49     | 35.72     | 35.64       | 32.25     | 33.98     |

GRASShopper did not finish computations because of too large memory requirements.

Table S4: CHLORELLA SOROKINIANA

REPORT FROM QUAST FOR ASSEMBLY RESULTS

| Genome statistics             | ALGA     | GRASShopper | MEGAHIT  | Platanus | Readjoinder | SAGE2    | SGA       | SOAPdenovo2 | SPAdes   | Velvet   |
|-------------------------------|----------|-------------|----------|----------|-------------|----------|-----------|-------------|----------|----------|
| Genome fraction (%)           | 96.038   | 93.242      | 96.761   | 96.181   | 50.267      | 13.913   | 95.181    | 74.077      | 96.601   | 25.189   |
| Duplication ratio             | 1.005    | 1.005       | 1.062    | 1.011    | 1.467       | 1.037    | 1.012     | 1.024       | 1.006    | 1.011    |
| Largest alignment             | 117281   | 87200       | 142903   | 117347   | 1004        | 2573     | 67064     | 6617        | 220875   | 2192     |
| Total aligned length          | 55533431 | 53854122    | 57523451 | 55993828 | 42279820    | 8124274  | 55393979  | 43621372    | 55733343 | 14589415 |
| NG50                          | 16566    | 14109       | 22674    | 10263    | 502         | -        | 10108     | 841         | 41564    | -        |
| NG75                          | 8470     | 6615        | 11809    | 5043     | -           | -        | 5002      | -           | 21185    | -        |
| NA50                          | 17293    | 15420       | 21338    | 10713    | 503         | 641      | 10650     | 1058        | 42121    | 679      |
| NA75                          | 9517     | 8417        | 10494    | 5684     | 500         | 519      | 5729      | 747         | 22260    | 566      |
| NGA50                         | 16529    | 14066       | 21889    | 10250    | 501         | -        | 10053     | 837         | 40286    | -        |
| NGA75                         | 8370     | 6517        | 11189    | 5040     | -           | -        | 4907      | -           | 19988    | -        |
| LG50                          | 1061     | 1207        | 774      | 1717     | 56945       | -        | 1766      | 21944       | 412      | -        |
| LG75                          | 2306     | 2680        | 1656     | 3738     | -           | -        | 3804      | -           | 908      | -        |
| LA50                          | 978      | 1054        | 827      | 1592     | 40963       | 4855     | 1620      | 14062       | 395      | 8753     |
| LA75                          | 2070     | 2229        | 1813     | 3373     | 62158       | 8483     | 3386      | 26424       | 855      | 14817    |
| LGA50                         | 1066     | 1210        | 793      | 1718     | 57082       | -        | 1769      | 22014       | 424      | -        |
| LGA75                         | 2319     | 2695        | 1712     | 3740     | -           | -        | 3822      | -           | 941      | -        |
| Misassemblies                 |          |             |          |          |             |          |           |             |          |          |
| # misassemblies               | 227      | 159         | 1644     | 197      | 17846       | 3868     | 218       | 47          | 324      | 66       |
| # relocations                 | 25       | 10          | 211      | 21       | 2098        | 439      | 19        | 6           | 53       | 13       |
| # translocations              | 201      | 145         | 1215     | 174      | 15737       | 3426     | 199       | 41          | 269      | 53       |
| # inversions                  | 1        | 4           | 218      | 2        | 11          | 3        | 0         | 0           | 2        | 0        |
| # misassembled contigs        | 192      | 154         | 1455     | 172      | 17818       | 2998     | 199       | 46          | 288      | 63       |
| Misassembled contigs length   | 1115863  | 827193      | 5528596  | 175974   | 8974226     | 2438874  | 805757    | 63941       | 5997919  | 48077    |
| # local misassemblies         | 172      | 113         | 1117     | 44       | 237         | 233      | 61        | 8           | 292      | 112      |
| # scaffold gap ext. mis.      | 0        | 0           | 0        | 0        | 0           | 0        | 0         | 0           | 0        | 0        |
| # scaffold gap loc. mis.      | 0        | 0           | 0        | 0        | 0           | 0        | 0         | 0           | 0        | 0        |
| # unaligned mis. contigs      | 5        | 3           | 818      | 1        | 4           | 3        | 2         | 2           | 5        | 32       |
| Unaligned                     |          |             |          |          |             |          |           |             |          |          |
| # fully unaligned contigs     | 76       | 60          | 1160     | 16       | 68          | 34       | 93        | 90          | 177      | 207      |
| Fully unaligned length        | 59940    | 54283       | 690910   | 14138    | 36343       | 21305    | 70441     | 61936       | 130737   | 302329   |
| # partially unaligned contigs | 48       | 60          | 318      | 9        | 1           | 6        | 63        | 23          | 158      | 34       |
| Partially unaligned length    | 41910    | 48338       | 246363   | 8975     | 511         | 3870     | 53866     | 16755       | 164992   | 40617    |
| Mismatches                    |          |             |          |          |             |          |           |             |          |          |
| # mismatches                  | 22234    | 1866        | 63080    | 2847     | 115591      | 18202    | 5187      | 15888       | 3122     | 5402     |
| # indels                      | 1224     | 451         | 3435     | 313      | 17764       | 5002     | 295       | 434         | 1028     | 1232     |
| Indels length                 | 12112    | 9269        | 55475    | 3363     | 33316       | 10957    | 2892      | 1251        | 31047    | 6508     |
| # mismatches per 100 kbp      | 40.19    | 3.47        | 113.17   | 5.14     | 399.17      | 227.1    | 9.46      | 37.23       | 5.61     | 37.23    |
| # indels per 100 kbp          | 2.21     | 0.84        | 6.16     | 0.56     | 61.34       | 62.41    | 0.54      | 1.02        | 1.85     | 8.49     |
| # indels (<= 5 bp)            | 1024     | 312         | 2378     | 208      | 17438       | 4893     | 211       | 414         | 458      | 1075     |
| # indels (> 5 bp)             | 200      | 139         | 1057     | 105      | 326         | 109      | 84        | 20          | 570      | 157      |
| # N's                         | 0        | 0           | 0        | 0        | 0           | 0        | 0         | 0           | 7        | 0        |
| # N's per 100 kbp             | 0        | 0           | 0        | 0        | 0           | 0        | 0         | 0           | 0.01     | 0        |
| Statistics without reference  |          |             |          |          |             |          |           |             |          |          |
| # contigs                     | 6005     | 6776        | 10949    | 9328     | 83239       | 11228    | 9696      | 44157       | 2809     | 21356    |
| # contigs (>= 0 bp)           | 6771     | 33616       | 66942    | 15355    | 1487787     | 52184    | 359727    | 981869      | 6209     | 80485    |
| # contigs (>= 1000 bp)        | 5233     | 5559        | 4064     | 7967     | 1           | 1507     | 7661      | 15864       | 2349     | 1536     |
| # contigs (>= 5000 bp)        | 3179     | 3229        | 2719     | 3763     | 0           | 0        | 3806      | 3           | 1776     | 15       |
| # contigs (>= 10000 bp)       | 1977     | 1910        | 1885     | 1782     | 0           | 0        | 1790      | 0           | 1440     | 1        |
| # contigs (>= 25000 bp)       | 473      | 412         | 649      | 193      | 0           | 0        | 187       | 0           | 767      | 0        |
| # contigs (>= 50000 bp)       | 63       | 36          | 132      | 10       | 0           | 0        | 3         | 0           | 314      | 0        |
| Largest contig                | 117283   | 87200       | 143048   | 117347   | 1004        | 2699     | 67064     | 6617        | 221020   | 12515    |
| Total length                  | 55710250 | 54075102    | 60152684 | 56064282 | 42513120    | 8336452  | 55598660  | 43772315    | 56267820 | 15008742 |
| Total length (>= 0 bp)        | 55971947 | 59129338    | 80072816 | 57805725 | 452219063   | 20755301 | 149957336 | 218045116   | 57070487 | 36045104 |
| Total length (>= 1000 bp)     | 55160341 | 53266876    | 56102500 | 55070004 | 1004        | 1810759  | 54245155  | 23781774    | 55962497 | 1944579  |
| Total length (>= 5000 bp)     | 49750326 | 47189609    | 52633346 | 44145328 | 0           | 0        | 44026993  | 17115       | 54492168 | 114397   |
| Total length (>= 10000 bp)    | 40985508 | 37709211    | 46516814 | 30011025 | 0           | 0        | 29593144  | 0           | 52018964 | 12515    |
| Total length (>= 25000 bp)    | 17583823 | 14760405    | 26389123 | 6349065  | 0           | 0        | 5857416   | 0           | 40778832 | 0        |
| Total length (>= 50000 bp)    | 3991182  | 2122477     | 8815108  | 693372   | 0           | 0        | 177887    | 0           | 24899338 | 0        |
| N50                           | 17318    | 15543       | 22058    | 10715    | 503         | 745      | 10667     | 1062        | 43837    | 693      |
| N75                           | 9600     | 8474        | 11029    | 5687     | 501         | 598      | 5781      | 751         | 23386    | 580      |
| L50                           | 973      | 1051        | 807      | 1591     | 40852       | 4260     | 1617      | 14025       | 384      | 8417     |
| L75                           | 2059     | 2218        | 1752     | 3371     | 62009       | 7401     | 3373      | 26332       | 826      | 14349    |
| GC (%)                        | 63.73    | 63.87       | 63.71    | 63.8     | 64.05       | 64.71    | 63.86     | 63.91       | 63.79    | 64.07    |

Table S5: ESCHERICHIA COLI

REPORT FROM QUAST FOR ASSEMBLY RESULTS

| Genome statistics             | ALGA    | GRASShopper | MEGAHIT | Platanus | Readjoiner | SAGE2   | SGA     | SOAPdenovo2 | SPAdes  | Velvet  |
|-------------------------------|---------|-------------|---------|----------|------------|---------|---------|-------------|---------|---------|
| Genome fraction (%)           | 98.128  | 53.26       | 98.458  | 97.459   | 3.336      | 93.944  | 97.793  | 97.706      | 98.427  | 91.905  |
| Duplication ratio             | 1.001   | 1.193       | 1.001   | 1.01     | 1.008      | 1       | 1.001   | 1.001       | 1       | 1.041   |
| Largest alignment             | 166847  | 3200        | 284869  | 58133    | 538        | 24062   | 174176  | 97152       | 224028  | 3832    |
| Total aligned length          | 4558176 | 2935200     | 4574946 | 4569691  | 155555     | 4360778 | 4545297 | 4539527     | 4570446 | 4438082 |
| NG50                          | 60754   | 291         | 124164  | 12333    | -          | 3350    | 51987   | 20370       | 133230  | 751     |
| NG75                          | 35258   | -           | 64626   | 6257     | -          | 1744    | 30906   | 12246       | 86559   | 489     |
| NA50                          | 60754   | 371         | 124164  | 12541    | 270        | 3619    | 52586   | 20760       | 133230  | 776     |
| NA75                          | 36049   | 298         | 64427   | 6525     | 259        | 2019    | 31674   | 12689       | 87059   | 522     |
| NGA50                         | 60754   | 288         | 124164  | 12333    | -          | 3350    | 51987   | 20370       | 133230  | 750     |
| NGA75                         | 35258   | -           | 64427   | 6257     | -          | 1744    | 30906   | 12246       | 86559   | 489     |
| LG50                          | 24      | 5371        | 13      | 104      | -          | 414     | 28      | 68          | 13      | 2060    |
| LG75                          | 49      | -           | 25      | 233      | -          | 889     | 58      | 140         | 24      | 3964    |
| LA50                          | 24      | 2710        | 13      | 101      | 261        | 374     | 27      | 65          | 13      | 1929    |
| LA75                          | 47      | 5025        | 25      | 225      | 409        | 776     | 55      | 134         | 23      | 3668    |
| LGA50                         | 24      | 5398        | 13      | 104      | -          | 414     | 28      | 68          | 13      | 2060    |
| LGA75                         | 49      | -           | 25      | 233      | -          | 889     | 58      | 140         | 24      | 3966    |
| Misassemblies                 |         |             |         |          |            |         |         |             |         |         |
| # misassemblies               | 0       | 7           | 1       | 1        | 1          | 0       | 0       | 0           | 1       | 1       |
| # relocations                 | 0       | 5           | 1       | 1        | 1          | 0       | 0       | 0           | 1       | 1       |
| # translocations              | 0       | 0           | 0       | 0        | 0          | 0       | 0       | 0           | 0       | 0       |
| # inversions                  | 0       | 2           | 0       | 0        | 0          | 0       | 0       | 0           | 0       | 0       |
| # misassembled contigs        | 0       | 7           | 1       | 1        | 1          | 0       | 0       | 0           | 1       | 1       |
| Misassembled contigs length   | 0       | 2577        | 2910    | 1811     | 297        | 0       | 0       | 0           | 107859  | 641     |
| # local misassemblies         | 3       | 11          | 17      | 0        | 0          | 0       | 0       | 0           | 2       | 3       |
| # scaffold gap ext. mis.      | 0       | 0           | 0       | 0        | 0          | 0       | 0       | 0           | 0       | 0       |
| # scaffold gap loc. mis.      | 0       | 0           | 0       | 0        | 0          | 0       | 0       | 0           | 0       | 0       |
| # unaligned mis. contigs      | 0       | 0           | 0       | 0        | 0          | 0       | 0       | 0           | 0       | 0       |
| Unaligned                     |         |             |         |          |            |         |         |             |         |         |
| # fully unaligned contigs     | 0       | 0           | 0       | 0        | 0          | 0       | 0       | 0           | 5       | 2       |
| Fully unaligned length        | 0       | 0           | 0       | 0        | 0          | 0       | 0       | 0           | 1608    | 1123    |
| # partially unaligned contigs | 0       | 0           | 0       | 0        | 0          | 0       | 0       | 0           | 0       | 1       |
| Partially unaligned length    | 0       | 0           | 0       | 0        | 0          | 0       | 0       | 0           | 0       | 530     |
| Mismatches                    |         |             |         |          |            |         |         |             |         |         |
| # mismatches                  | 340     | 3341        | 157     | 2        | 3          | 4       | 42      | 15          | 62      | 782     |
| # indels                      | 2       | 1300        | 17      | 1        | 1          | 0       | 1       | 1           | 3       | 40      |
| Indels length                 | 2       | 2884        | 319     | 2        | 1          | 0       | 2       | 2           | 4       | 126     |
| # mismatches per 100 kbp      | 7.46    | 135.15      | 3.44    | 0.04     | 1.94       | 0.09    | 0.93    | 0.33        | 1.36    | 18.33   |
| # indels per 100 kbp          | 0.04    | 52.59       | 0.37    | 0.02     | 0.65       | 0       | 0.02    | 0.02        | 0.07    | 0.94    |
| # indels (<= 5 bp)            | 2       | 1246        | 14      | 1        | 1          | 0       | 1       | 1           | 3       | 39      |
| # indels (> 5 bp)             | 0       | 54          | 3       | 0        | 0          | 0       | 0       | 0           | 0       | 1       |
| # N's                         | 0       | 0           | 0       | 0        | 0          | 0       | 0       | 0           | 0       | 0       |
| # N's per 100 kbp             | 0       | 0           | 0       | 0        | 0          | 0       | 0       | 0           | 0       | 0       |
| Statistics without reference  |         |             |         |          |            |         |         |             |         |         |
| # contigs                     | 194     | 7715        | 119     | 808      | 561        | 1863    | 218     | 388         | 94      | 6606    |
| # contigs (>= 0 bp)           | 241     | 52293       | 133     | 1987     | 159220     | 3577    | 2533    | 2615        | 175     | 6606    |
| # contigs (>= 1000 bp)        | 145     | 155         | 87      | 560      | 0          | 1273    | 160     | 328         | 67      | 1044    |
| # contigs (>= 5000 bp)        | 103     | 0           | 59      | 271      | 0          | 186     | 117     | 235         | 51      | 0       |
| # contigs (>= 10000 bp)       | 90      | 0           | 55      | 145      | 0          | 17      | 101     | 158         | 47      | 0       |
| # contigs (>= 25000 bp)       | 62      | 0           | 47      | 31       | 0          | 0       | 65      | 53          | 44      | 0       |
| # contigs (>= 50000 bp)       | 34      | 0           | 29      | 3        | 0          | 0       | 29      | 8           | 32      | 0       |
| Largest contig                | 166847  | 3200        | 285131  | 58133    | 538        | 24062   | 174176  | 97152       | 224028  | 3832    |
| Total length                  | 4558417 | 2948969     | 4576125 | 4569796  | 156095     | 4360798 | 4545481 | 4539731     | 4572315 | 4440582 |
| Total length (>= 0 bp)        | 4567042 | 8640784     | 4579403 | 4717384  | 20517020   | 4552367 | 4858776 | 4757989     | 4583360 | 4440582 |
| Total length (>= 1000 bp)     | 4536286 | 228049      | 4560973 | 4454044  | 0          | 4003167 | 4522922 | 4512499     | 4560245 | 1444347 |
| Total length (>= 5000 bp)     | 4441637 | 0           | 4492803 | 3697112  | 0          | 1380809 | 4419156 | 4268349     | 4523388 | 0       |
| Total length (>= 10000 bp)    | 4336567 | 0           | 4462929 | 2780857  | 0          | 222980  | 4293954 | 3681996     | 4493604 | 0       |
| Total length (>= 25000 bp)    | 3890167 | 0           | 4345203 | 1110586  | 0          | 0       | 3702484 | 2000445     | 4441633 | 0       |
| Total length (>= 50000 bp)    | 2883228 | 0           | 3724522 | 162627   | 0          | 0       | 2382690 | 537084      | 4016107 | 0       |
| N50                           | 60754   | 374         | 124164  | 12541    | 270        | 3619    | 52586   | 20760       | 133230  | 776     |
| N75                           | 36049   | 300         | 64626   | 6525     | 259        | 2019    | 31674   | 12689       | 87059   | 524     |
| L50                           | 24      | 2701        | 13      | 101      | 260        | 374     | 27      | 65          | 13      | 1928    |
| L75                           | 47      | 5002        | 25      | 225      | 408        | 776     | 55      | 134         | 23      | 3666    |
| GC (%)                        | 50.74   | 48.91       | 50.74   | 50.74    | 51.87      | 50.71   | 50.72   | 50.72       | 50.74   | 50.77   |



Table S6: MICROTHRIX PARVICELLA

REPORT FROM QUAST FOR ASSEMBLY RESULTS

| Genome statistics             | ALGA    | GRASShopper | MEGAHIT | Platanus | Readjoinder | SAGE2   | SGA     | SOAPdenovo2 | SPAdes  | Velvet  |
|-------------------------------|---------|-------------|---------|----------|-------------|---------|---------|-------------|---------|---------|
| Genome fraction (%)           | 98.733  | 98.777      | 98.768  | 98.632   | 72.471      | 97.834  | 98.764  | 98.491      | 98.967  | 98.269  |
| Duplication ratio             | 1.001   | 1.007       | 1.001   | 1.01     | 1.107       | 1.001   | 1.002   | 1.001       | 1.001   | 1.006   |
| Largest alignment             | 209112  | 127818      | 408073  | 78680    | 1662        | 104005  | 295212  | 156108      | 740450  | 32170   |
| Total aligned length          | 4152364 | 4176105     | 4152278 | 4184941  | 3369597     | 4114581 | 4157976 | 4143440     | 4161687 | 4154946 |
| NG50                          | 80267   | 32094       | 160873  | 9301     | 332         | 18362   | 69463   | 49036       | 156137  | 7980    |
| NG75                          | 44053   | 17844       | 105714  | 5263     | 262         | 8851    | 40405   | 29040       | 104284  | 4112    |
| NA50                          | 87496   | 32079       | 153944  | 9305     | 368         | 18743   | 69463   | 49560       | 150746  | 8083    |
| NA75                          | 44059   | 17526       | 92835   | 5300     | 300         | 9281    | 40459   | 30583       | 73687   | 4201    |
| NGA50                         | 80267   | 32079       | 150423  | 9301     | 332         | 18362   | 69463   | 49036       | 151220  | 7980    |
| NGA75                         | 44053   | 17081       | 92835   | 5263     | 261         | 8851    | 40405   | 29040       | 88932   | 4112    |
| LG50                          | 18      | 37          | 9       | 136      | 4575        | 71      | 19      | 27          | 9       | 163     |
| LG75                          | 35      | 81          | 17      | 283      | 8156        | 153     | 40      | 54          | 17      | 341     |
| LA50                          | 17      | 37          | 10      | 135      | 3386        | 69      | 19      | 26          | 10      | 160     |
| LA75                          | 34      | 82          | 19      | 281      | 5933        | 147     | 39      | 52          | 20      | 334     |
| LGA50                         | 18      | 37          | 11      | 136      | 4578        | 71      | 19      | 27          | 9       | 163     |
| LGA75                         | 35      | 83          | 19      | 283      | 8162        | 154     | 40      | 54          | 18      | 341     |
| Misassemblies                 |         |             |         |          |             |         |         |             |         |         |
| # misassemblies               | 0       | 9           | 8       | 2        | 0           | 1       | 2       | 1           | 4       | 3       |
| # relocations                 | 0       | 2           | 2       | 0        | 0           | 0       | 0       | 0           | 0       | 1       |
| # translocations              | 0       | 7           | 6       | 2        | 0           | 1       | 2       | 1           | 4       | 2       |
| # inversions                  | 0       | 0           | 0       | 0        | 0           | 0       | 0       | 0           | 0       | 0       |
| # misassembled contigs        | 0       | 9           | 7       | 2        | 0           | 1       | 2       | 1           | 4       | 3       |
| Misassembled contigs length   | 0       | 270985      | 812186  | 26171    | 0           | 42886   | 36426   | 23430       | 368501  | 4801    |
| # local misassemblies         | 2       | 8           | 11      | 0        | 0           | 0       | 0       | 0           | 1       | 0       |
| # scaffold gap ext. mis.      | 0       | 0           | 0       | 0        | 0           | 0       | 0       | 0           | 0       | 0       |
| # scaffold gap loc. mis.      | 0       | 0           | 0       | 0        | 0           | 0       | 0       | 0           | 0       | 0       |
| # unaligned mis. contigs      | 0       | 0           | 0       | 0        | 0           | 0       | 0       | 0           | 0       | 0       |
| Unaligned                     |         |             |         |          |             |         |         |             |         |         |
| # fully unaligned contigs     | 0       | 5           | 81      | 0        | 0           | 0       | 0       | 1           | 730     | 14      |
| Fully unaligned length        | 0       | 2021        | 34613   | 0        | 0           | 0       | 0       | 257         | 233698  | 4876    |
| # partially unaligned contigs | 0       | 0           | 0       | 0        | 0           | 0       | 0       | 0           | 0       | 0       |
| Partially unaligned length    | 0       | 0           | 0       | 0        | 0           | 0       | 0       | 0           | 0       | 0       |
| Mismatches                    |         |             |         |          |             |         |         |             |         |         |
| # mismatches                  | 101     | 359         | 278     | 20       | 23          | 18      | 431     | 33          | 62      | 329     |
| # indels                      | 12      | 75          | 82      | 1        | 6           | 2       | 2       | 3           | 8       | 18      |
| Indels length                 | 156     | 523         | 1976    | 2        | 6           | 68      | 3       | 70          | 334     | 142     |
| # mismatches per 100 kbp      | 2.43    | 8.65        | 6.7     | 0.48     | 0.76        | 0.44    | 10.38   | 0.8         | 1.49    | 7.97    |
| # indels per 100 kbp          | 0.29    | 1.81        | 1.98    | 0.02     | 0.2         | 0.05    | 0.05    | 0.07        | 0.19    | 0.44    |
| # indels (<= 5 bp)            | 3       | 63          | 16      | 1        | 6           | 1       | 2       | 2           | 2       | 8       |
| # indels (> 5 bp)             | 9       | 12          | 66      | 0        | 0           | 1       | 0       | 1           | 6       | 10      |
| # N's                         | 0       | 0           | 0       | 0        | 0           | 0       | 0       | 0           | 19      | 0       |
| # N's per 100 kbp             | 0       | 0           | 0       | 0        | 0           | 0       | 0       | 0           | 0.43    | 0       |
| Statistics without reference  |         |             |         |          |             |         |         |             |         |         |
| # contigs                     | 174     | 353         | 153     | 764      | 9015        | 480     | 176     | 201         | 809     | 927     |
| # contigs (>= 0 bp)           | 202     | 462         | 158     | 1426     | 37923       | 671     | 994     | 1434        | 1300    | 927     |
| # contigs (>= 1000 bp)        | 133     | 236         | 61      | 624      | 33          | 385     | 132     | 161         | 64      | 730     |
| # contigs (>= 5000 bp)        | 89      | 161         | 46      | 296      | 0           | 220     | 94      | 116         | 49      | 290     |
| # contigs (>= 10000 bp)       | 69      | 111         | 40      | 112      | 0           | 135     | 76      | 91          | 44      | 115     |
| # contigs (>= 25000 bp)       | 44      | 52          | 29      | 13       | 0           | 39      | 52      | 57          | 30      | 2       |
| # contigs (>= 50000 bp)       | 29      | 17          | 23      | 1        | 0           | 3       | 29      | 25          | 23      | 0       |
| Largest contig                | 209112  | 138392      | 408073  | 78680    | 1662        | 104005  | 295212  | 156108      | 740450  | 32170   |
| Total length                  | 4152931 | 4181438     | 4190056 | 4185158  | 3371541     | 4114795 | 4158186 | 4144018     | 4395905 | 4160128 |
| Total length (>= 0 bp)        | 4158288 | 4199749     | 4191117 | 4255877  | 7796775     | 4138567 | 4263726 | 4255657     | 4495775 | 4160128 |
| Total length (>= 1000 bp)     | 4133413 | 4131448     | 4154833 | 4104486  | 39030       | 4060481 | 4139201 | 4125032     | 4160739 | 4048842 |
| Total length (>= 5000 bp)     | 4038154 | 3939942     | 4123843 | 3222573  | 0           | 3625586 | 4059303 | 4020902     | 4130144 | 2921428 |
| Total length (>= 10000 bp)    | 3890025 | 3576427     | 4079954 | 1880361  | 0           | 2984399 | 3928341 | 3830466     | 4096247 | 1677011 |
| Total length (>= 25000 bp)    | 3502288 | 2550857     | 3907613 | 442483   | 0           | 1432183 | 3544422 | 3246701     | 3877039 | 58068   |
| Total length (>= 50000 bp)    | 2901848 | 1356310     | 3664257 | 78680    | 0           | 220427  | 2692240 | 2032528     | 3608506 | 0       |
| N50                           | 87496   | 32450       | 160873  | 9305     | 369         | 19052   | 69463   | 49560       | 151220  | 8083    |
| N75                           | 44064   | 17850       | 105714  | 5304     | 300         | 9281    | 40459   | 30583       | 82635   | 4201    |
| L50                           | 17      | 36          | 9       | 135      | 3384        | 68      | 19      | 26          | 10      | 160     |
| L75                           | 34      | 80          | 17      | 280      | 5930        | 146     | 39      | 52          | 19      | 334     |
| GC (%)                        | 66.42   | 66.4        | 66.31   | 66.46    | 66.29       | 66.43   | 66.43   | 66.42       | 65.87   | 66.43   |

Table S7: HOMO SAPIENS CHROMOSOME 14

BUSCO MEASURE FOR ASSEMBLY RESULTS

|                  | Dataset        | Complete BUSCOs | Complete and single-copy BUSCOs | Complete and duplicated BUSCOs | Fragmented BUSCOs | Missing BUSCOs | Total BUSCO groups searched |
|------------------|----------------|-----------------|---------------------------------|--------------------------------|-------------------|----------------|-----------------------------|
| reference genome | primates_odb10 | 435             | 435                             | 0                              | 16                | 13329          | 13780                       |
| ALGA             | primates_odb10 | 141             | 141                             | 0                              | 56                | 13583          | 13780                       |
| GRASShopPER      | primates_odb10 | 43              | 43                              | 0                              | 22                | 13715          | 13780                       |
| Platanus         | primates_odb10 | 40              | 40                              | 0                              | 22                | 13718          | 13780                       |
| SAGE2            | primates_odb10 | 65              | 65                              | 0                              | 41                | 13674          | 13780                       |
| SGA              | primates_odb10 | 109             | 109                             | 0                              | 56                | 13615          | 13780                       |
| SOAPdenovo2      | primates_odb10 | 115             | 115                             | 0                              | 49                | 13616          | 13780                       |
| Velvet           | primates_odb10 | 86              | 86                              | 0                              | 46                | 13648          | 13780                       |

Table S8: CAENORHABDITIS ELEGANS

|                  | Dataset        | Complete BUSCOs | Complete and single-copy BUSCOs | Complete and duplicated BUSCOs | Fragmented BUSCOs | Missing BUSCOs | Total BUSCO groups searched |
|------------------|----------------|-----------------|---------------------------------|--------------------------------|-------------------|----------------|-----------------------------|
| reference genome | nematoda_odb10 | 3113            | 3096                            | 17                             | 3                 | 15             | 3131                        |
| ALGA             | nematoda_odb10 | 2820            | 2808                            | 12                             | 174               | 137            | 3131                        |
| GRASShopPER      | nematoda_odb10 | 2678            | 2667                            | 11                             | 239               | 214            | 3131                        |
| Platanus         | nematoda_odb10 | 2751            | 2740                            | 11                             | 203               | 177            | 3131                        |
| SAGE2            | nematoda_odb10 | 2569            | 2547                            | 22                             | 250               | 312            | 3131                        |
| SGA              | nematoda_odb10 | 2825            | 2812                            | 13                             | 179               | 127            | 3131                        |
| SOAPdenovo2      | nematoda_odb10 | 2751            | 2737                            | 14                             | 206               | 174            | 3131                        |
| Velvet           | nematoda_odb10 | 2466            | 2446                            | 20                             | 324               | 341            | 3131                        |

Table S9: ARABIDOPSIS THALIANA

|                  | Dataset           | Complete BUSCOs | Complete and single-copy BUSCOs | Complete and duplicated BUSCOs | Fragmented BUSCOs | Missing BUSCOs | Total BUSCO groups searched |
|------------------|-------------------|-----------------|---------------------------------|--------------------------------|-------------------|----------------|-----------------------------|
| reference genome | brassicales_odb10 | 4533            | 4495                            | 38                             | 6                 | 57             | 4596                        |
| ALGA             | brassicales_odb10 | 4388            | 4336                            | 52                             | 74                | 134            | 4596                        |
| GRASShopPER      | brassicales_odb10 |                 |                                 |                                |                   |                | 4596                        |
| Platanus         | brassicales_odb10 | 4339            | 4301                            | 38                             | 108               | 149            | 4596                        |
| SAGE2            | brassicales_odb10 | 4428            | 4382                            | 46                             | 68                | 100            | 4596                        |
| SGA              | brassicales_odb10 | 4451            | 4413                            | 38                             | 45                | 100            | 4596                        |
| SOAPdenovo2      | brassicales_odb10 | 4331            | 4288                            | 43                             | 119               | 146            | 4596                        |
| Velvet           | brassicales_odb10 | 3695            | 3654                            | 41                             | 417               | 484            | 4596                        |

Table S10: CHLORELLA SOROKINIANA

|                  | Dataset           | Complete BUSCOs | Complete and single-copy BUSCOs | Complete and duplicated BUSCOs | Fragmented BUSCOs | Missing BUSCOs | Total BUSCO groups searched |
|------------------|-------------------|-----------------|---------------------------------|--------------------------------|-------------------|----------------|-----------------------------|
| reference genome | chlorophyta_odb10 | 1488            | 1475                            | 13                             | 9                 | 22             | 1519                        |
| ALGA             | chlorophyta_odb10 | 1429            | 1421                            | 8                              | 52                | 38             | 1519                        |
| GRASShopPER      | chlorophyta_odb10 | 1388            | 1379                            | 9                              | 76                | 55             | 1519                        |
| Platanus         | chlorophyta_odb10 | 1374            | 1364                            | 10                             | 85                | 60             | 1519                        |
| SAGE2            | chlorophyta_odb10 | 87              | 86                              | 1                              | 162               | 1270           | 1519                        |
| SGA              | chlorophyta_odb10 | 1298            | 1290                            | 8                              | 125               | 96             | 1519                        |
| SOAPdenovo2      | chlorophyta_odb10 | 301             | 297                             | 4                              | 390               | 828            | 1519                        |
| Velvet           | chlorophyta_odb10 | 32              | 32                              | 0                              | 188               | 1299           | 1519                        |

Table S11: ESCHERICHIA COLI

|                  | Dataset                | Complete BUSCOs | Complete and single-copy BUSCOs | Complete and duplicated BUSCOs | Fragmented BUSCOs | Missing BUSCOs | Total BUSCO groups searched |
|------------------|------------------------|-----------------|---------------------------------|--------------------------------|-------------------|----------------|-----------------------------|
| reference genome | enterobacterales_odb10 | 440             | 438                             | 2                              | 0                 | 0              | 440                         |
| ALGA             | enterobacterales_odb10 | 439             | 437                             | 2                              | 1                 | 0              | 440                         |
| GRASShopPER      | enterobacterales_odb10 | 27              | 24                              | 3                              | 108               | 305            | 440                         |
| Platanus         | enterobacterales_odb10 | 416             | 414                             | 2                              | 17                | 7              | 440                         |
| SAGE2            | enterobacterales_odb10 | 137             | 137                             | 0                              | 150               | 153            | 440                         |
| SGA              | enterobacterales_odb10 | 440             | 438                             | 2                              | 0                 | 0              | 440                         |
| SOAPdenovo2      | enterobacterales_odb10 | 434             | 433                             | 1                              | 6                 | 0              | 440                         |
| Velvet           | enterobacterales_odb10 | 147             | 146                             | 1                              | 179               | 114            | 440                         |

Table S12: MICROTHRIX PARVICELLA

|                  | Dataset        | Complete BUSCOs | Complete and single-copy BUSCOs | Complete and duplicated BUSCOs | Fragmented BUSCOs | Missing BUSCOs | Total BUSCO groups searched |
|------------------|----------------|-----------------|---------------------------------|--------------------------------|-------------------|----------------|-----------------------------|
| reference genome | bacteria_odb10 | 116             | 116                             | 0                              | 5                 | 3              | 124                         |
| ALGA             | bacteria_odb10 | 116             | 116                             | 0                              | 5                 | 3              | 124                         |
| GRASShopPER      | bacteria_odb10 | 115             | 115                             | 0                              | 6                 | 3              | 124                         |
| Platanus         | bacteria_odb10 | 108             | 108                             | 0                              | 12                | 4              | 124                         |
| SAGE2            | bacteria_odb10 | 20              | 19                              | 1                              | 63                | 41             | 124                         |
| SGA              | bacteria_odb10 | 116             | 116                             | 0                              | 5                 | 3              | 124                         |
| SOAPdenovo2      | bacteria_odb10 | 113             | 113                             | 0                              | 8                 | 3              | 124                         |
| Velvet           | bacteria_odb10 | 108             | 108                             | 0                              | 13                | 3              | 124                         |

## TIME AND MEMORY CONSUMPTION

**Table S13: MEMORY PEAK [GB]**

|             | H. sapiens chr. 14 | C. elegans | A. thaliana | C. sorokiniana | E. coli | M. parvicella | H. sapiens |
|-------------|--------------------|------------|-------------|----------------|---------|---------------|------------|
| ALGA        | 11.2               | 19.3       | 19.9        | 27.9           | 7.8     | 1.8           | 247.3      |
| GRASShopPER | 85.4               | 361.6      |             | 638.9          | 192.0   | 17.6          |            |
| MEGAHIT     | 3.0                | 6.1        | 8.0         | 18.9           | 3.7     | 0.8           | 87.6       |
| Platanus    | 67.3               | 122.1      | 106.1       | 120.0          | 117.6   | 117.6         |            |
| Readjoiner  | 1.1                | 2.3        | 3.0         | 6.4            | 1.7     | 0.3           |            |
| SAGE2       | 13.4               | 21.7       | 28.1        | 18.3           | 4.6     | 1.5           |            |
| SGA         | 1.7                | 3.3        | 4.2         | 7.7            | 1.8     | 0.3           | 43.5       |
| SOAPdenovo2 | 7.1                | 7.3        | 25.5        | 16.3           | 1.8     | 2.5           | 269.3      |
| SPAdes      | 15.9               | 14.4       | *           | 49.2           | 10.7    | 10.6          |            |
| Velvet      | 29.9               | 21.0       | 127.6       | 107.6          | 10.1    | 9.3           |            |

**Table S14: ELAPSED (WALL CLOCK) TIME [hh:mm:ss]**

|             | H. sapiens chr. 14 | C. elegans | A. thaliana | C. sorokiniana | E. coli  | M. parvicella | H. sapiens |
|-------------|--------------------|------------|-------------|----------------|----------|---------------|------------|
| ALGA        | 00:11:09           | 00:24:48   | 00:31:53    | 00:48:11       | 00:04:06 | 00:01:29      | 15:31:50   |
| GRASShopPER | 06:31:44           | 57:12:58   |             | 53:33:33       | 15:29:26 | 02:02:28      |            |
| MEGAHIT     | 00:16:50           | 00:31:59   | 00:59:18    | 04:30:26       | 00:10:16 | 00:02:38      | 15:43:34   |
| Platanus    | 00:13:47           | 01:03:06   | 01:41:31    | 03:50:25       | 00:37:55 | 00:16:39      |            |
| Readjoiner  | 00:07:26           | 00:07:29   | 00:12:02    | 00:52:28       | 00:04:55 | 00:00:41      |            |
| SAGE2       | 03:27:03           | 04:46:44   | 04:01:31    | 02:34:26       | 00:18:14 | 00:04:03      |            |
| SGA         | 01:18:11           | 02:33:15   | 03:52:03    | 09:54:32       | 01:12:16 | 00:11:47      | 98:58:49   |
| SOAPdenovo2 | 00:15:11           | 00:27:02   | 00:37:58    | 01:21:05       | 00:09:05 | 00:02:13      | 15:46:12   |
| SPAdes      | 11:11:27           | 12:14:42   | *           | 22:22:05       | 01:10:39 | 00:26:50      |            |
| Velvet      | 01:18:53           | 02:05:00   | 04:09:57    | 14:42:04       | 00:44:50 | 00:08:52      |            |

*\*) SPAdes finished computations, but there was a technical problem with the measurement.*

**Table S15: MUSKET CORRECTION**

|                  | H. sapiens chr. 14 | C. elegans | A. thaliana | C. sorokiniana | E. coli  | M. parvicella | H. sapiens |
|------------------|--------------------|------------|-------------|----------------|----------|---------------|------------|
| Memory peak [GB] | 3.1                | 1.7        | 7.2         | 12.2           | 0.5      | 0.5           | 72.3       |
| Time [hh:mm:ss]  | 00:17:02           | 00:18:58   | 00:40:50    | 01:28:05       | 00:11:52 | 00:05:38      | 07:15:14   |



Table S16: HOMO SAPIENS WHOLE GENOME

REPORT FROM QUAST

| Genome statistics             | ALGA       | MEGAHIT    | SGA        | SOAPdenovo2 |
|-------------------------------|------------|------------|------------|-------------|
| Genome fraction (%)           | 90.297     | 91.707     | 90.538     | 85.723      |
| Duplication ratio             | 1.009      | 1.04       | 1.108      | 1.018       |
| Largest alignment             | 140579     | 453369     | 67917      | 47254       |
| Total aligned length          | 2775879684 | 2892744943 | 3055094153 | 2658682524  |
| NG50                          | 11495      | 41177      | 4481       | 2495        |
| NG75                          | 3686       | 14935      | 1468       | 687         |
| NA50                          | 13834      | 39249      | 4753       | 3264        |
| NA75                          | 6648       | 18170      | 1813       | 1544        |
| NGA50                         | 11453      | 35275      | 4471       | 2490        |
| NGA75                         | 3648       | 12734      | 1452       | 677         |
| LG50                          | 74181      | 21702      | 186133     | 318442      |
| LG75                          | 191808     | 52682      | 486999     | 903374      |
| LA50                          | 57752      | 21670      | 172243     | 223748      |
| LA75                          | 129950     | 48872      | 428400     | 520190      |
| LGA50                         | 74402      | 25104      | 186503     | 318873      |
| LGA75                         | 192694     | 61377      | 489004     | 907520      |
| Misassemblies                 |            |            |            |             |
| # misassemblies               | 2230       | 30456      | 3688       | 739         |
| # relocations                 | 1161       | 5815       | 1747       | 397         |
| # translocations              | 1034       | 23354      | 1863       | 299         |
| # inversions                  | 35         | 1287       | 78         | 43          |
| # misassembled contigs        | 2090       | 27715      | 3560       | 705         |
| Misassembled contigs length   | 13097797   | 705421771  | 6953129    | 1447334     |
| # local misassemblies         | 4209       | 15849      | 6296       | 2026        |
| # scaffold gap ext. mis.      | 0          | 0          | 0          | 0           |
| # scaffold gap loc. mis.      | 0          | 0          | 0          | 0           |
| # unaligned mis. contigs      | 1189       | 2398       | 1079       | 339         |
| Unaligned                     |            |            |            |             |
| # fully unaligned contigs     | 17690      | 115368     | 44272      | 10928       |
| Fully unaligned length        | 8777301    | 40941253   | 15838074   | 5297029     |
| # partially unaligned contigs | 2031       | 2067       | 1684       | 752         |
| Partially unaligned length    | 3193085    | 3325133    | 2313312    | 939636      |
| Mismatches                    |            |            |            |             |
| # mismatches                  | 2959935    | 5229732    | 3441365    | 2349688     |
| # indels                      | 569648     | 859258     | 802806     | 365301      |
| Indels length                 | 2228894    | 4226723    | 2889390    | 1217634     |
| # mismatches per 100 kbp      | 107.5      | 187.01     | 124.65     | 89.89       |
| # indels per 100 kbp          | 20.69      | 30.73      | 29.08      | 13.97       |
| # indels (<= 5 bp)            | 483698     | 716539     | 692550     | 320088      |
| # indels (> 5 bp)             | 85950      | 142719     | 110256     | 45213       |
| # N's                         | 0          | 0          | 0          | 0           |
| # N's per 100 kbp             | 0          | 0          | 0          | 0           |
| Statistics without reference  |            |            |            |             |
| # contigs                     | 582040     | 728920     | 2111636    | 1559273     |
| # contigs (>= 0 bp)           | 647131     | 1050311    | 8029560    | 12376038    |
| # contigs (>= 1000 bp)        | 313815     | 114854     | 588579     | 724792      |
| # contigs (>= 5000 bp)        | 160051     | 78635      | 161134     | 110106      |
| # contigs (>= 10000 bp)       | 87580      | 63511      | 46655      | 20157       |
| # contigs (>= 25000 bp)       | 19100      | 37014      | 2473       | 358         |
| # contigs (>= 50000 bp)       | 2048       | 16185      | 33         | 0           |
| Largest contig                | 140579     | 453909     | 67917      | 47254       |
| Total length                  | 2790359536 | 2953804967 | 3077843557 | 2667281219  |
| Total length (>= 0 bp)        | 2803904187 | 3025191016 | 4050122556 | 3654318968  |
| Total length (>= 1000 bp)     | 2659625172 | 2734266794 | 2530880678 | 2258048882  |
| Total length (>= 5000 bp)     | 2269990638 | 2651336854 | 1486353131 | 878393530   |
| Total length (>= 10000 bp)    | 1748347814 | 2540616224 | 693958318  | 271525858   |
| Total length (>= 25000 bp)    | 689782714  | 2099381482 | 76228873   | 10337952    |
| Total length (>= 50000 bp)    | 126578797  | 1354606311 | 1874179    | 0           |
| N50                           | 13881      | 45488      | 4764       | 3269        |
| N75                           | 6683       | 21314      | 1827       | 1551        |
| L50                           | 57586      | 18751      | 171908     | 223496      |
| L75                           | 129511     | 42025      | 426954     | 519141      |
| GC (%)                        | 40.85      | 40.95      | 40.82      | 40.63       |

**Table S17: PERFORMANCE OF ALGA WITH PARAMETER "--error-rate=0.05"**

|                         | H. sapiens chr. 14 | C. elegans | A. thaliana | C. sorokiniana | E. coli  | M. parvicella |
|-------------------------|--------------------|------------|-------------|----------------|----------|---------------|
| Genome fraction (%)     | 92.443             | 95.396     | 94.711      | 96.083         | 96.865   | 98.183        |
| Duplication ratio       | 1.004              | 1.004      | 1.010       | 1.005          | 1.004    | 1.002         |
| Largest alignment       | 75282              | 147600     | 141405      | 117363         | 70255    | 127169        |
| NG50                    | 4609               | 14768      | 14682       | 16448          | 21625    | 40321         |
| Misassembled contigs    | 173376             | 349183     | 655323      | 1166215        | 9248     | 10128         |
| Fully unaligned length  | 20966              | 10843      | 5584528     | 59742          | 0        | 0             |
| Partially unaligned ler | 10081              | 50351      | 43376       | 42066          | 0        | 0             |
| # contigs               | 32466              | 19732      | 42628       | 6015           | 391      | 277           |
| Memory peak [GB]        | 14.1               | 24.1       | 26.7        | 32.5           | 7.8      | 2.2           |
| Time [hh:mm:ss]         | 00:14:53           | 00:51:21   | 00:40:13    | 01:33:20       | 00:04:35 | 00:01:38      |
